# Supplementary material for: SINHCAF/FAM60A and SIN3A specifically repress HIF-2α expression
Source: PubMed Central journal article supplement (PMC6024822; doi:10.1042/bcj20170945), 2018-06-29

## Supplemental Figure Legends Biddlestone et al.

### SINHCAF/FAM60A and SIN3A specifically repress HIF 2 $\alpha$ expression

**Figure S1: SINHCAF as a HIF 2 $\alpha$  repressor.** (A) qPCR validation using HeLa cells, for SINHCAF and SIN3A. Graphs depict mean + S.E.M. \*  $P \leq 0.05$ , \*\*  $P \leq 0.01$ , \*\*\*  $P \leq 0.001$ . (B) Quantification of HIF 2 $\alpha$  protein levels following SINHCAF depletion compared to control cells exposed to hypoxia. Graph depicts mean and S.E.M. of HIF 2 $\alpha$  protein levels normalised to actin of a minimum of 3 independent experiments. Graphs depict mean + S.E.M. \*  $P \leq 0.05$ , \*\*  $P \leq 0.01$ , \*\*\*  $P \leq 0.001$ . (C) Quantification of HIF 2 $\alpha$  protein levels following SIN3A depletion compared to control cells exposed to hypoxia. Graph depicts mean and S.E.M. of HIF 2 $\alpha$  protein levels normalised to actin of a minimum of 3 independent experiments. Graphs depict mean + S.E.M. \*  $P \leq 0.05$ , \*\*  $P \leq 0.01$ , \*\*\*  $P \leq 0.001$ . (D) Quantification of HIF 2 $\alpha$  protein levels following SINHCAF, PHD2 or SINHCAF and PHD2 depletion compared to control cells exposed to hypoxia. Graph depicts mean and S.E.M. of HIF 2 $\alpha$  protein levels normalised to actin of a minimum of 3 independent experiments. Graphs depict mean + S.E.M. \*  $P \leq 0.05$ , \*\*  $P \leq 0.01$ .

**Figure S2: SINHCAF represses the HIF 2 $\alpha$  promoter.** (A) U2OS-HIF 2 $\alpha$  promoter cells were transfected with 1 $\mu$ g of control or SINHCAF expressing plasmids prior to lysis and luciferase assay being performed. Graphs depict mean + S.E.M. \*  $P \leq 0.05$ , \*\*  $P \leq 0.01$ , \*\*\*  $P \leq 0.001$ .

**Figure S3: Validation of SP1 and SP3 knockdown levels.** (A) qPCR and western blot validation for siRNA using HeLa cells. Graphs depict mean + S.E.M. \*  $P \leq 0.05$ , \*\*  $P \leq 0.01$ , \*\*\*  $P \leq 0.001$ . HeLa cells were transfected with the indicated siRNA oligonucleotides and exposed where indicated to 1% O<sub>2</sub> for 24 hours prior to cell lysis. Whole cell lysates were analysed by immunoblot for the levels of the depicted proteins.

**Figure S4: Colony formation assay following SINHCAF and HIF 2 $\alpha$ .** (A) Colony Formation: HeLa and DLD-1 cells were seeded for colony formation following siRNA transfection. Representative images are displayed.

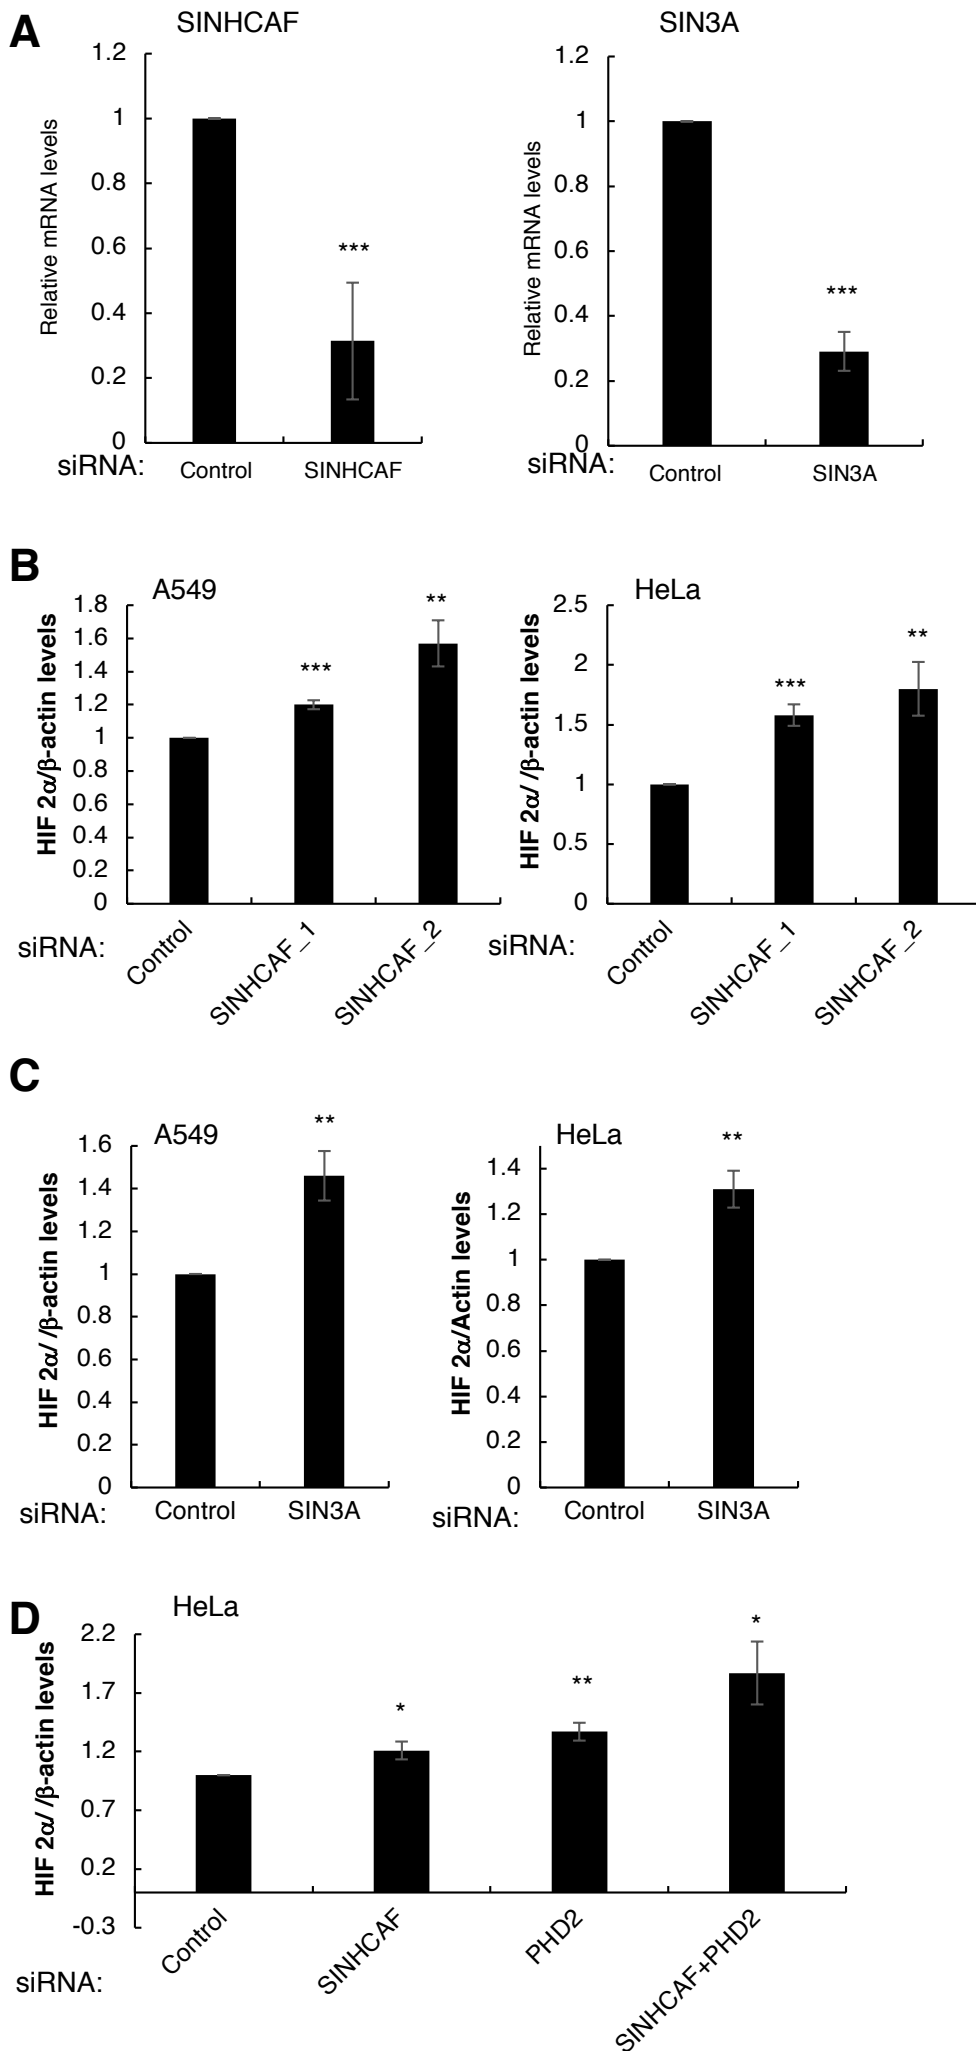

**A**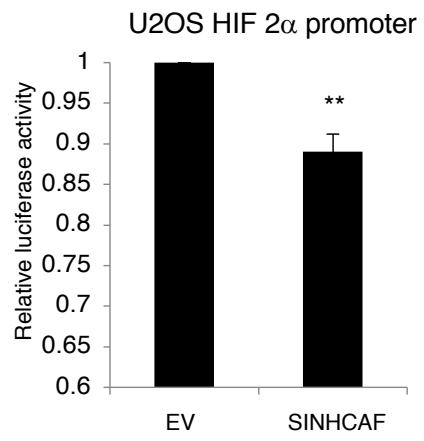

**A**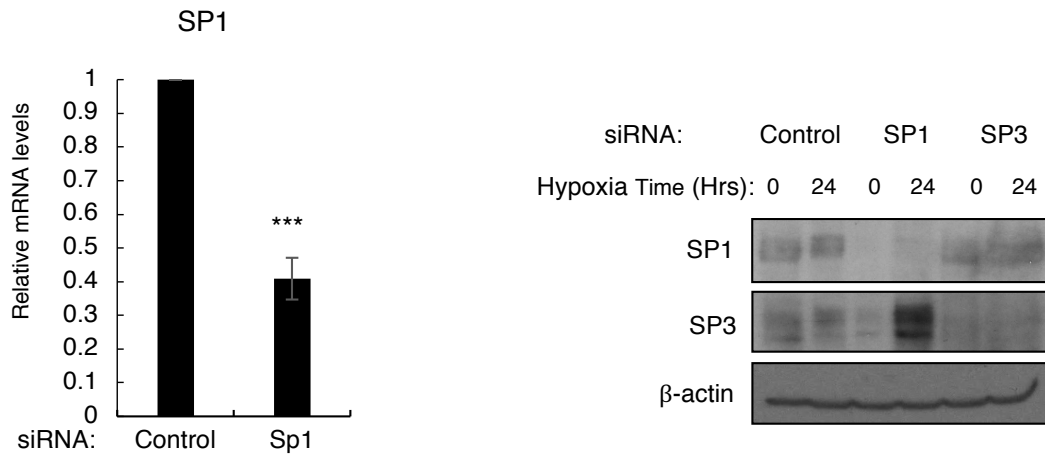

**A**

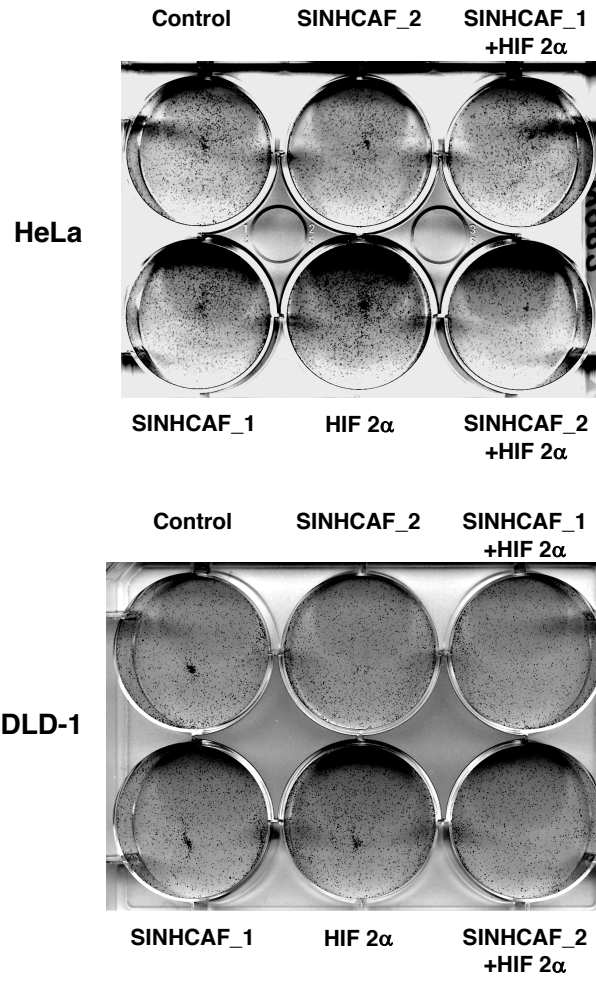

Supplement: BCJ-475-2073-s1.pdf [file BCJ-475-2073-s1.pdf]
